# Supplementary material
Source: Springer Nature journal article supplement (https://www.springermedizin.de/resource/supplementary/12974_2010_349_MOESM4_ESM.pdf/9601480)

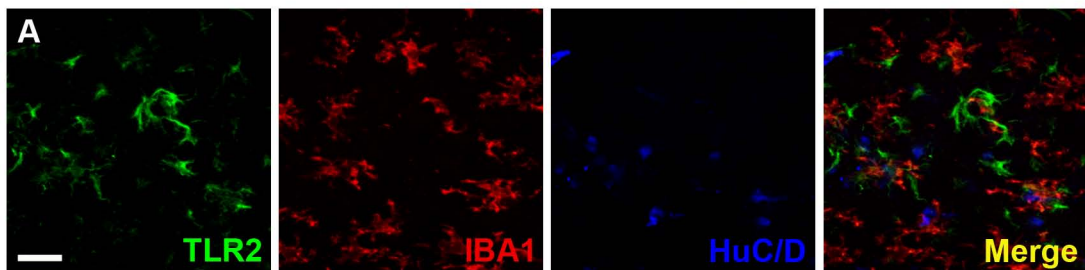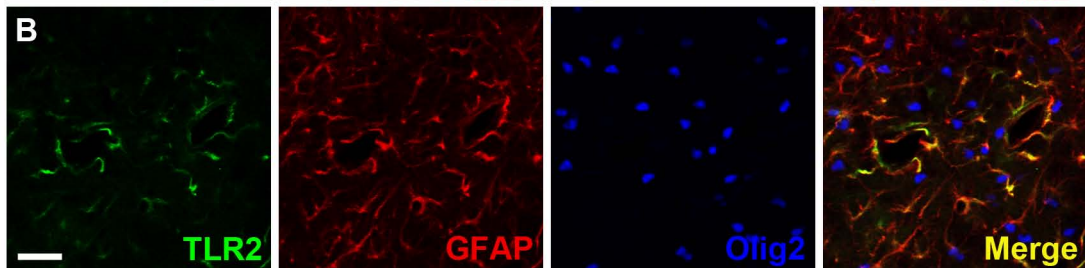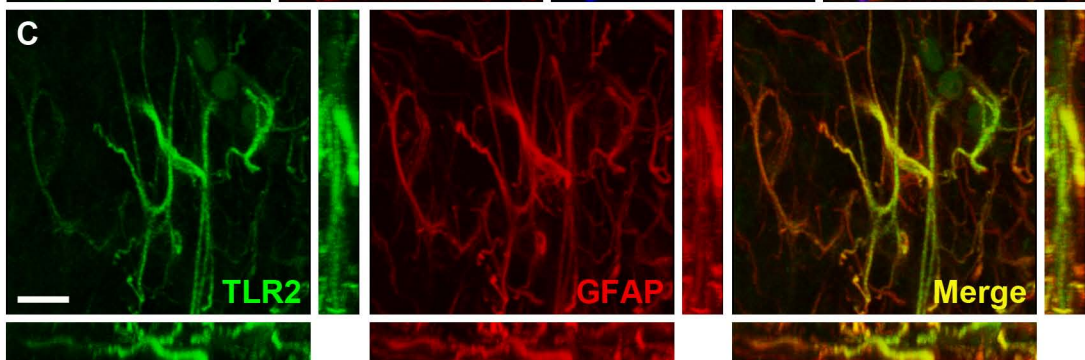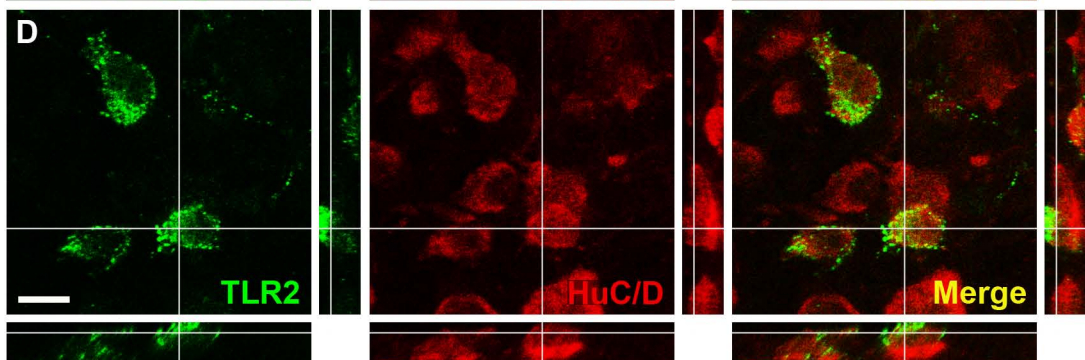

Supplement: MOESM4 [file 9601480]
